# Supplementary material
Source: PubMed Central journal article supplement (PMC1100764)
Supplement: pnas_102_19_6825__2.pdf [file pnas_102_19_6825__2.pdf]

**Table 3. Binding free energy from the MM/PBSA approximation**

| Free energy terms | (kcal/mol)       |
|-------------------|------------------|
| $G_{LP}$          | $-1624.5 \pm 38$ |
| $G_P$             | $-1474.3 \pm 31$ |
| $G_L$             | $-788.3 \pm 5$   |
| $\Delta E_{LP}$   | $-728.8 \pm 41$  |
| $\Delta G_{LP}$   | $-90.7 \pm 20$   |
| Orientation       | +4.5             |
| Translation       | +3.4             |
| $G_{bind}$        | $-82.8 \pm 20$   |
